# Supplementary material
Source: publisher site journal article supplement (https://www.dovepress.com/article/490343)
Supplement: Supplementary file 1 [file 490343%20Revised%20Supplementary%20Material.pdf]

## **Supplementary Material**

### **Gold/Prussian Blue-Based Nanocomposites with Dual Nanozyme Activities Exert a Synergistic Effect of Starvation Therapy and Sonodynamic Therapy in the Treatment of Liver Cancer**

#### **1. Supporting methods**

##### **Synthesis and characterization of thiolated hyaluronic acid (HA-SH)**

A quantity of 0.5 mmol HA was dissolved in 50 mL PBS solution (pH=7.4) at room temperature. Then 0.4 mmol EDC and NHS were added in sequence to react with HA for 2 h to activate the carboxyl under continuous stirring. After activation, 5 mmol of Cys was added to the HA mixture and the reaction was carried out overnight. Afterward, the reaction mixture was dialyzed in deionized water for 24 hours in a dialysis bag with a molecular weight threshold of 3500 Da. Afterward, the pH of the aforementioned solution was carefully adjusted to 8.0 using 1 M NaOH. Then, 2.5 mmol DTT was introduced to the solution and left to stir overnight. Next, the acidity of the solution was modified to a range of 3.0-4.0 using HCl, and subsequently moved into a dialysis bag with a molecular weight cut-off of 3500 Da. The bag underwent dialysis against a 0.1 M NaCl solution (pH 3.0-4.0) for a duration of 24 hours, followed by dialysis against an aqueous solution with a pH range of 3.0-4.0 for an additional 24 hours. The purified solution was lyophilized to obtain white flocs, namely thiolated HA, and stored at 4 °C. The chemical structure of HA-SH was characterized by FT-IR and <sup>1</sup>H NMR (400 MHz).

## 2. Supporting figures

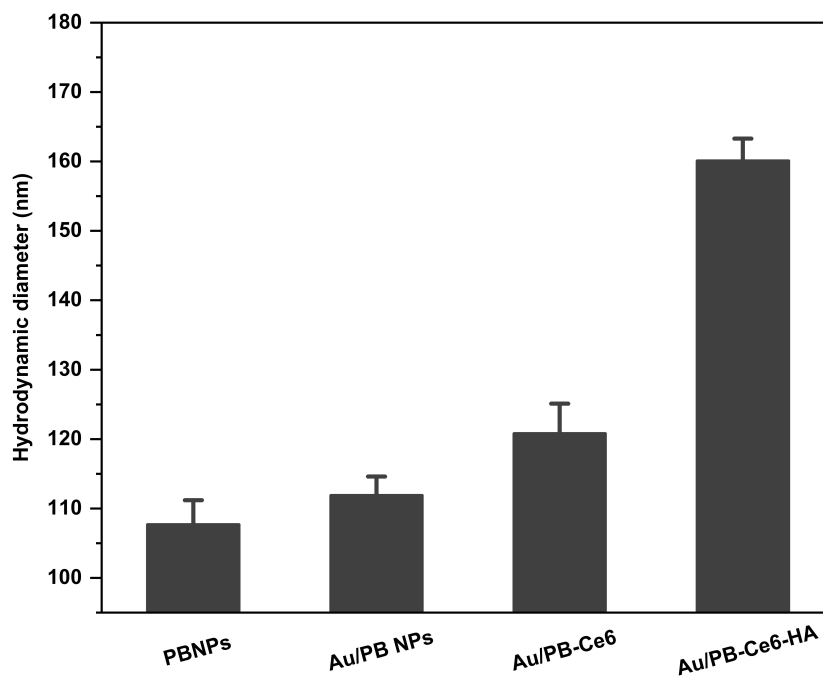

**Figure S1** DLS result of PBNPs, Au/PB NPs, Au/PB-Ce6 and Au/PB-Ce6-HA.

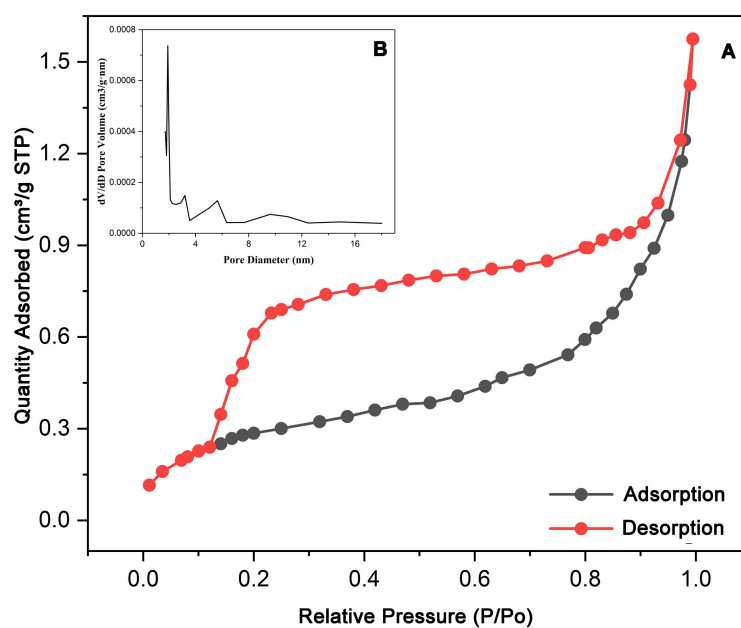

**Figure S2** Nitrogen adsorption-desorption isotherm (A) and BJH pore size distribution (B) of PBNPs.

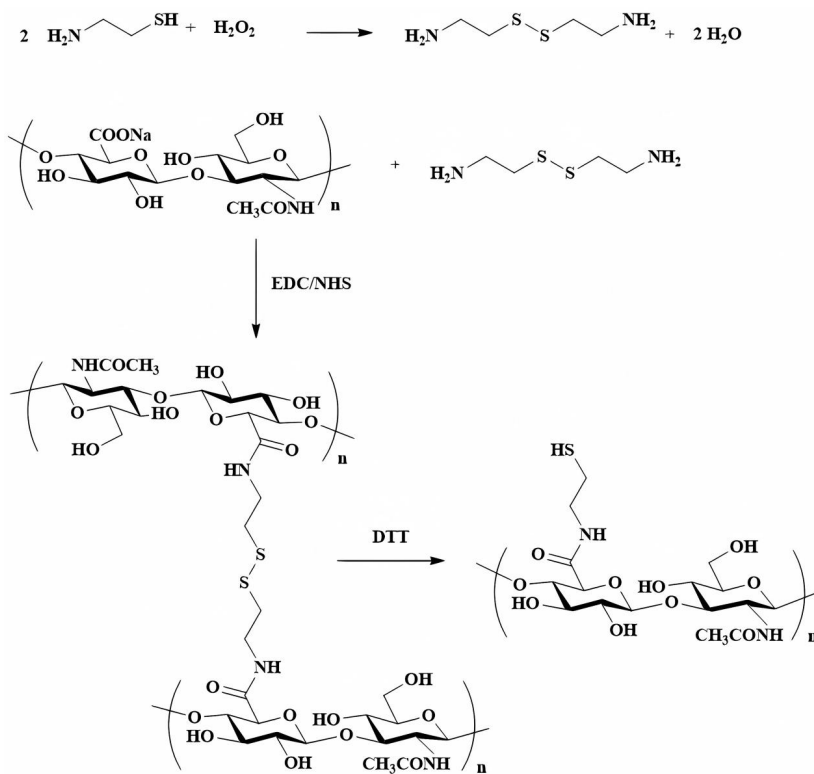

**Figure S3** Synthetic route of HA-SH.

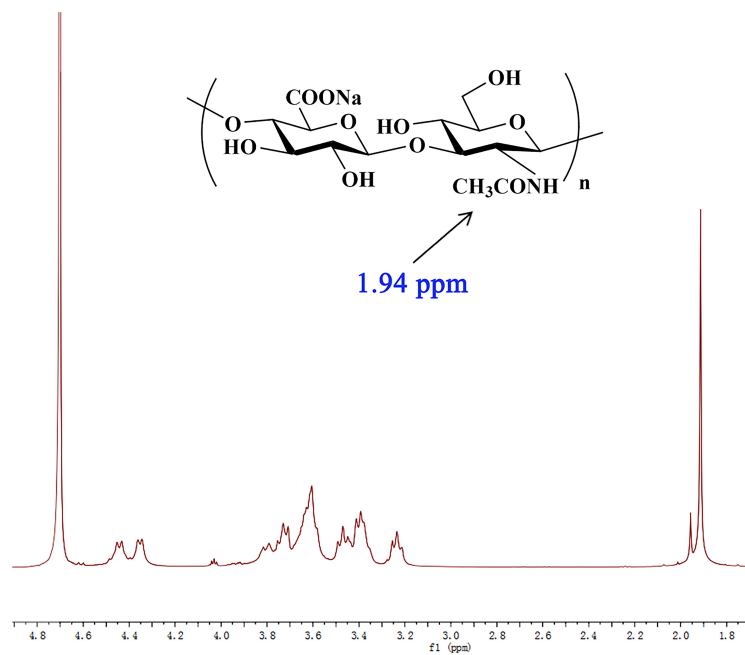

**Figure S4**  $^1\text{H}$  NMR spectra of HA in  $\text{D}_2\text{O}$ .

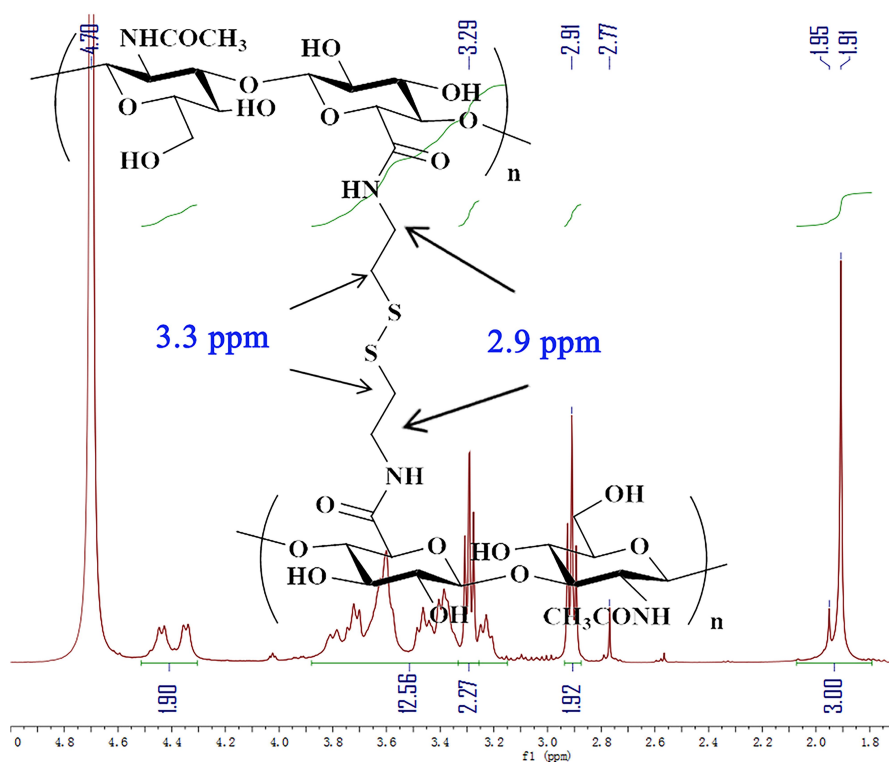

Figure S5  $^1\text{H}$  NMR spectra of HA-Cys in  $\text{D}_2\text{O}$ .

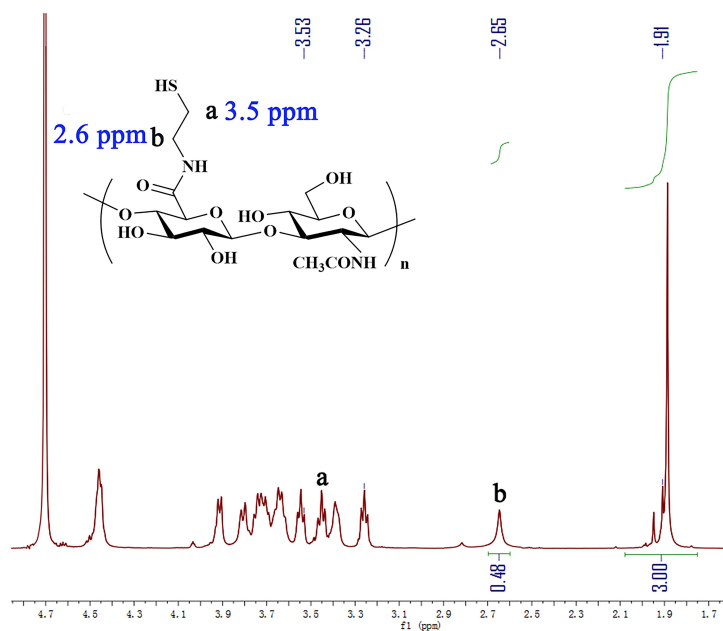

Figure S6  $^1\text{H}$  NMR spectra of HA-SH in  $\text{D}_2\text{O}$ .

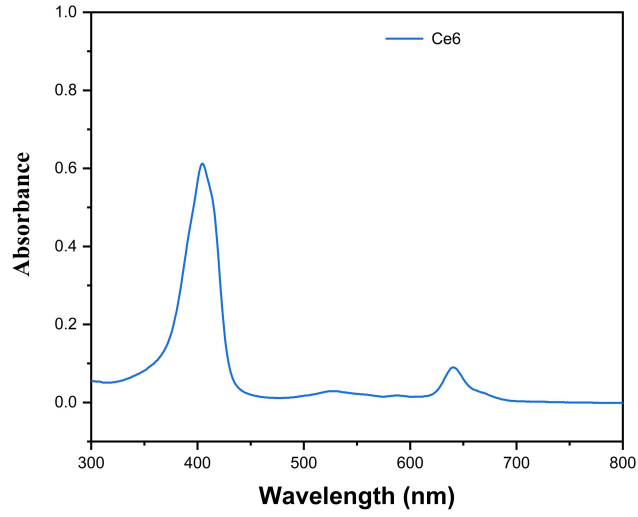

Figure S7 UV-Vis spectral scanning of Ce6 solutions.

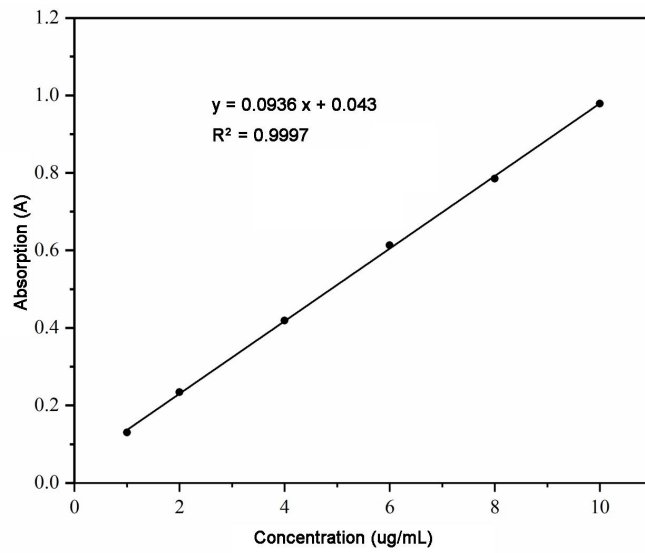

Figure S8 The standard curve of Ce6.

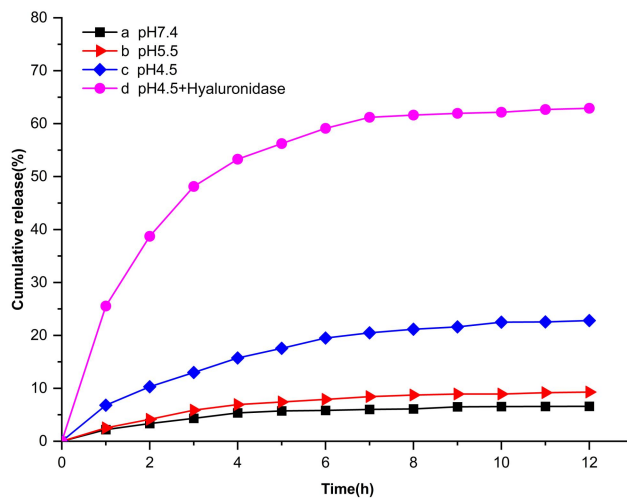

Figure S9 The release curve of Ce6.

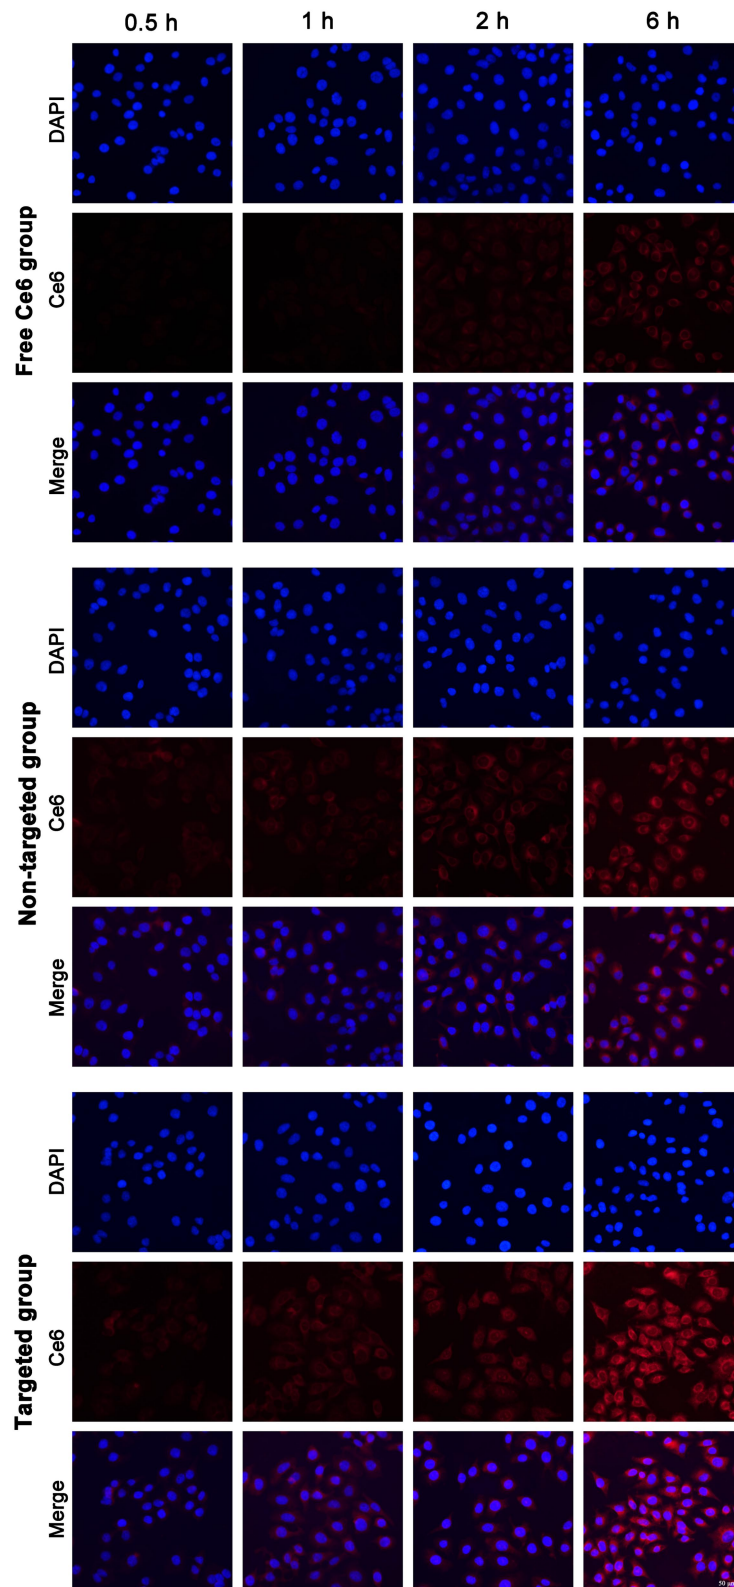

**Figure S10** Cellular uptake of different drug administration groups by HepG2 cells. Free group: Ce6; Non-targeted group: Au/PB-Ce6; Targeted group: Au/PB-Ce6-HA. The concentration of Ce6 was  $10 \mu\text{g mL}^{-1}$  (scale bar,  $50 \mu\text{m}$ ).

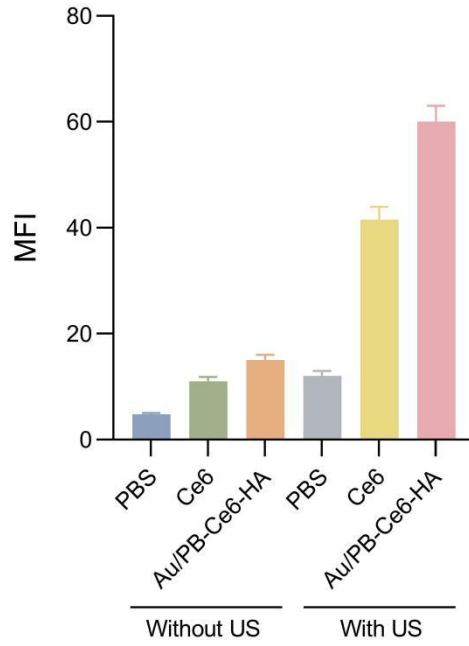

**Figure S11** Mean fluorescence intensity (MFI) of cells treated with PBS, Ce6, or Au/PB-Ce6-HA, with or without ultrasound radiation, respectively.

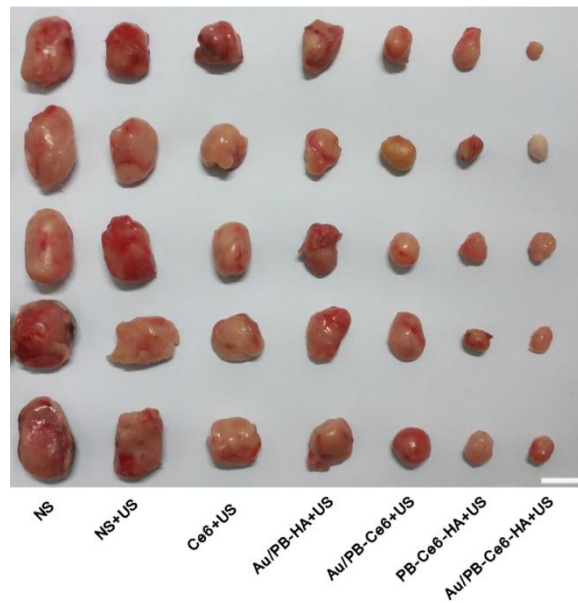

**Figure S12** Photos of tumor tissue of H22 tumor-bearing mice treated with different groups (Scale bar = 1 cm).
